# Supplementary material
Source: publisher figshare collection journal article supplement (https://sage.figshare.com/ndownloader/files/30883914)
Supplement: Supplementary file 1 [file 30883914]

**Supplement**

**List of e-Figures and e-Tables**

**e-Figure 1.** Study flow diagram: bipolar disorder versus the comparison controls

**e-Table 1.** ICD-9-CM codes for medical illnesses

**e-Table 2.** Incidences and aIRRs of medical illnesses in the 2nd year after the index date among patients with newly diagnosed bipolar disorder compared with age- and sex-matched controls

**e-Table 3.** Incidences and aIRRs of medical illnesses in the 3rd year after the index date among patients with newly diagnosed bipolar disorder compared with age- and sex-matched controls

**e-Table 4.** Incidences and aIRRs of medical illnesses in the 4th year after the index date among patients with newly diagnosed bipolar disorder compared with age- and sex-matched controls

**e-Table 5.** Incidences and aIRRs of medical illnesses in the 5th year after the index date among patients with newly diagnosed bipolar disorder compared with age- and sex-matched controls

**e-Table 6.** Incidences and aIRRs of medical illnesses in the 1st year after the diagnosed bipolar disorder compared to the 2nd, 3rd, 4th, 5th year, respectively

**e-Table 7.** Incidences and aIRRs of medical illnesses in the 1st year after the index date among patients with newly diagnosed bipolar disorder aged 13-18 (adolescent-onset) compared with age- and sex-matched controls

**e-Table 8.** Incidences and aIRRs of medical illnesses in the 1st year after the index date among patients with newly diagnosed bipolar disorder aged 19-40 (adult-onset) compared with age- and sex-matched controls

**e-Figure 2.** Study flow diagram of the first sensitivity analysis: bipolar disorder (aged 13-29) versus the comparison controls

**e-Table 9.** The first sensitivity analysis: incidences and aIRRs of medical illnesses in the 1st year after the index date among patients with newly diagnosed bipolar disorder aged 13-29 compared with age- and sex-matched controls

**e-Figure 3.** Study flow diagram of the second sensitivity analysis: bipolar disorder (5-year washout period) versus the comparison controls

**e-Table 10.** The second sensitivity analysis: incidences and aIRRs of medical illnesses in the 1st year after the index date among patients with newly diagnosed bipolar disorder between 2001 and 2011 compared with age- and sex-matched controls

**e-Figure 1.** Study flow diagram: bipolar disorder versus the comparison controls

Patients with consistent diagnosis of bipolar disorder (ICD-9-CM code: 296·0 to 296·16, 296·4 to 296·81, 296·89) between 1998/1/1 and 2012/12/31 (*n* = 42,470)

No diagnosis of bipolar disorder between 1996/1/1 and 1997/12/31 (*n* = 42,085)

Bipolar disorder group (*n* = 22,021)

Patients with ICD-9-CM code 290·** to 319·**) in the Taiwan Nationwide Psychiatric Inpatient Medical Claims (PIMC) database between 1996/1/1 and 2012/12/31 (*n* = 256,880)

Excluding ever diagnosed with schizophrenia (ICD-9-CM code: 295·**) in the study cohort between 1996/1/1 and 2012/12/31 (*n* = 20,064)

Age-and sex-matched comparison group (ratio: 1:4) randomly selected from the Taiwan National Health Insurance Research Database between 1998/1/1 and 2011/12/31

Patients aged 13–40 years receiving their first diagnosis of bipolar disorder between 1998/1/1 and 2011/12/31 (*n* = 11,884)

Valid case-comparison pairs for all incident bipolar disorder patients (11,884 bipolar cases and 47,536 comparisons)

Patients aged 13–40 years receiving their first diagnosis of bipolar disorder (*n* = 13,079)

**e-Table 1. ICD-9-CM codes for medical illnesses**

| Medical illnesses | ICD-9-CM codes |
| --- | --- |
| Cardiovascular diseases |  |
| Hypertension | 401–405 |
| Ischaemic heart disease | 410–414 |
| Congestive heart failure | 428, 429.3, 402.01, 402.11, 402.91, 404.01, 404.03, 404.11, 404.13, 404.91, 404.93 |
| Other forms of heart disease | 420–429 |
| Diseases of arteries, arterioles, and capillaries | 440–449 |
| Diseases of veins and lymphatics | 451–459 |
| Cerebrovascular diseases | 430–438 |
| Respiratory diseases |  |
| URI | 460 |
| Pneumonia | 480–486, 507 |
| Asthma | 493 |
| Chronic bronchitis | 491 |
| COPD | 490, 491, 492, 496, A323, A325 |
| Tuberculosis | 010–018 |
| Gastrointestinal diseases |  |
| Chronic hepatic disease | 571 |
| Ulcer | 531–534 |
| Irritable bowel syndrome | 564.1 |
| Renal diseases |  |
| Chronic kidney disease and renal failure | 585, 586, V56, V420, V451, 39.27, 39.42, 39.93, 39.94, 39.95, 54.98 |
| Endocrine/metabolic diseases |  |
| Diabetes mellitus | 250 |
| Hyperlipidaemia | 272 |
| Musculoskeletal/integument diseases |  |
| Connective tissue disease | 710, 714 |
| Atopic dermatitis | 691 |
| HIV infection | 042, 043, 044 |
| Cancer | 140–209 |

Abbreviation: COPD = chronic obstructive pulmonary disease, HIV = human immunodeficiency virus, URI = upper respiratory tract infection.

**e-Table 2.** Incidences and adjusted incidence rate ratios of medical illnesses in the 2nd year after the index date among patients with newly diagnosed bipolar disorder compared with age- and sex-matched controls

|  | Patients  (N = 11,884) | | | Controls  (N = 47,536) | | | aIRRa | 95% CI | *P* value |
| --- | --- | --- | --- | --- | --- | --- | --- | --- | --- |
|  | N | Person-Years of Total Cohort | Crude Incidence /100,000 | N | Person-Years of Total Cohort | Crude Incidence /100,000 |  |  |  |
| Cardiovascular diseases |  |  |  |  |  |  |  |  |  |
| Hypertension | 120 | 9666 | 1241.5 | 264 | 41219 | 640.5 | 1.94 | 1.56–2.41 | <0.001 |
| Ischaemic heart disease | 85 | 9916 | 857.2 | 134 | 41815 | 320.5 | 2.67 | 2.04–3.51 | <0.001 |
| Congestive heart failure | 22 | 10360 | 212.4 | 29 | 42437 | 68.3 | 3.11 | 1.79–5.41 | <0.001 |
| Other forms of heart disease | 173 | 8752 | 1976.7 | 296 | 40094 | 738.3 | 2.68 | 2.22–3.23 | <0.001 |
| Diseases of arteries, arterioles, and capillaries | 36 | 10160 | 354.3 | 75 | 42021 | 178.5 | 1.99 | 1.33–2.95 | 0.001 |
| Diseases of veins and lymphatics | 219 | 8825 | 2481.6 | 536 | 39095 | 1371.0 | 1.81 | 1.55–2.12 | <0.001 |
| Cerebrovascular diseases | 87 | 9897 | 879.1 | 64 | 42045 | 152.2 | 5.77 | 4.18–7.97 | <0.001 |
| Respiratory diseases |  |  |  |  |  |  |  |  |  |
| URI | 442 | 4218 | 10478.9 | 1748 | 19598 | 8919.3 | 1.17 | 1.06–1.30 | 0.002 |
| Pneumonia | 195 | 9167 | 2127.2 | 331 | 40332 | 820.7 | 2.59 | 2.17–3.09 | <0.001 |
| Asthma | 128 | 9122 | 1403.2 | 298 | 39565 | 753.2 | 1.86 | 1.51–2.29 | <0.001 |
| Chronic bronchitis | 132 | 9531 | 1385.0 | 261 | 40465 | 645.0 | 2.15 | 1.74–2.65 | <0.001 |
| COPD | 188 | 7047 | 2667.8 | 405 | 31716 | 1277.0 | 2.09 | 1.75–2.48 | <0.001 |
| Tuberculosis | 16 | 10314 | 155.1 | 38 | 42307 | 89.8 | 1.73 | 0.96–3.10 | 0.067 |
| Gastrointestinal diseases |  |  |  |  |  |  |  |  |  |
| Chronic hepatic disease | 248 | 7880 | 3147.2 | 604 | 37595 | 1606.6 | 1.96 | 1.69–2.27 | <0.001 |
| Ulcer | 258 | 6147 | 4197.2 | 691 | 31782 | 2174.2 | 1.93 | 1.67–2.23 | <0.001 |
| Irritable bowel syndrome | 166 | 9172 | 1809.9 | 341 | 40168 | 848.9 | 2.13 | 1.77–2.57 | <0.001 |
| Renal diseases |  |  |  |  |  |  |  |  |  |
| Chronic kidney disease and renal failure | 31 | 10362 | 299.2 | 29 | 42410 | 68.4 | 4.38 | 2.64–7.26 | <0.001 |
| Endocrine diseases |  |  |  |  |  |  |  |  |  |
| Diabetes mellitus | 123 | 9805 | 1254.5 | 187 | 41427 | 451.4 | 2.78 | 2.21–3.49 | <0.001 |
| Hyperlipidaemia | 193 | 9442 | 2044.1 | 362 | 40613 | 891.3 | 2.29 | 1.93–2.73 | <0.001 |
| Musculoskeletal/integument diseases |  |  |  |  |  |  |  |  |  |
| Connective tissue disease | 53 | 9701 | 546.3 | 146 | 40955 | 356.5 | 1.53 | 1.12–2.10 | 0.008 |
| Atopic dermatitis | 101 | 9718 | 1039.3 | 321 | 40230 | 797.9 | 1.30 | 1.04–1.63 | 0.021 |
| HIV infection | 9 | 10446 | 86.2 | 7 | 42596 | 16.4 | 5.24 | 1.95–14.08 | 0.001 |
| Cancer | 31 | 10172 | 304.8 | 77 | 41996 | 183.4 | 1.66 | 1.10–2.52 | 0.017 |

aEstimated using Poisson regression model.

Abbreviation: aIRR = adjusted incidence rate ratio, CI = confidence interval, COPD = chronic obstructive pulmonary disease, HIV = human immunodeficiency virus, URI = upper respiratory tract infection.

**e-Table 3.** Incidences and adjusted incidence rate ratios of medical illnesses in the 3rd year after the index date among patients with newly diagnosed bipolar disorder compared with age- and sex-matched controls

|  | Patients  (N = 11,884) | | | Controls  (N = 47,536) | | | aIRRa | 95% CI | *P* value |
| --- | --- | --- | --- | --- | --- | --- | --- | --- | --- |
|  | N | Person-Years of Total Cohort | Crude Incidence /100,000 | N | Person-Years of Total Cohort | Crude Incidence /100,000 |  |  |  |
| Cardiovascular diseases |  |  |  |  |  |  |  |  |  |
| Hypertension | 129 | 8410 | 1533.9 | 251 | 36380 | 689.9 | 2.22 | 1.80–2.75 | <0.001 |
| Ischaemic heart disease | 60 | 8664 | 692.5 | 133 | 37019 | 359.3 | 1.93 | 1.42–2.61 | <0.001 |
| Congestive heart failure | 18 | 9116 | 197.5 | 29 | 37657 | 77.0 | 2.56 | 1.42–4.62 | 0.002 |
| Other forms of heart disease | 139 | 7601 | 1828.7 | 256 | 35425 | 722.7 | 2.53 | 2.06–3.11 | <0.001 |
| Diseases of arteries, arterioles, and capillaries | 42 | 8936 | 470.0 | 74 | 37270 | 198.6 | 2.37 | 1.62–3.46 | <0.001 |
| Diseases of veins and lymphatics | 186 | 7606 | 2445.4 | 495 | 34370 | 1440.2 | 1.70 | 1.43–2.01 | <0.001 |
| Cerebrovascular diseases | 55 | 8661 | 635.0 | 50 | 37297 | 134.1 | 4.74 | 3.23–6.95 | <0.001 |
| Respiratory diseases |  |  |  |  |  |  |  |  |  |
| URI | 340 | 3410 | 9970.7 | 1400 | 16735 | 8365.7 | 1.19 | 1.06–1.34 | 0.004 |
| Pneumonia | 147 | 8018 | 1833.4 | 286 | 35540 | 804.7 | 2.28 | 1.87–2.78 | <0.001 |
| Asthma | 116 | 7997 | 1450.5 | 266 | 35150 | 756.8 | 1.92 | 1.54–2.38 | <0.001 |
| Chronic bronchitis | 109 | 8305 | 1312.5 | 212 | 35774 | 592.6 | 2.21 | 1.76–2.79 | <0.001 |
| COPD | 146 | 6082 | 2400.5 | 336 | 28210 | 1191.1 | 2.02 | 1.66–2.45 | <0.001 |
| Tuberculosis | 15 | 9083 | 165.1 | 37 | 37555 | 98.5 | 1.68 | 0.92–3.05 | 0.092 |
| Gastrointestinal diseases |  |  |  |  |  |  |  |  |  |
| Chronic hepatic disease | 187 | 6695 | 2793.1 | 513 | 32835 | 1562.4 | 1.79 | 1.51–2.11 | <0.001 |
| Ulcer | 180 | 5153 | 3493.1 | 612 | 27616 | 2216.1 | 1.58 | 1.33–1.86 | <0.001 |
| Irritable bowel syndrome | 126 | 7961 | 1582.7 | 281 | 35484 | 791.9 | 2.00 | 1.62–2.47 | <0.001 |
| Renal diseases |  |  |  |  |  |  |  |  |  |
| Chronic kidney disease and renal failure | 28 | 8109 | 345.3 | 17 | 37647 | 45.2 | 7.65 | 4.19-13.97 | <0.001 |
| Endocrine diseases |  |  |  |  |  |  |  |  |  |
| Diabetes mellitus | 107 | 8531 | 1254.3 | 161 | 36614 | 439.7 | 2.85 | 2.23–3.64 | <0.001 |
| Hyperlipidaemia | 143 | 8175 | 1749.2 | 363 | 35785 | 1014.4 | 1.72 | 1.42–2.09 | <0.001 |
| Musculoskeletal/integument diseases |  |  |  |  |  |  |  |  |  |
| Connective tissue disease | 63 | 8490 | 742.1 | 106 | 36245 | 292.5 | 2.54 | 1.86–3.47 | <0.001 |
| Atopic dermatitis | 105 | 8509 | 1234.0 | 310 | 35662 | 869.3 | 1.42 | 1.14–1.77 | 0.002 |
| HIV infection | 4 | 9206 | 43.5 | 8 | 37829 | 21.2 | 2.05 | 0.62–6.82 | 0.240 |
| Cancer | 37 | 8937 | 414.0 | 74 | 37221 | 198.8 | 2.08 | 1.40–3.09 | <0.001 |

aEstimated using Poisson regression model.

Abbreviation: aIRR = adjusted incidence rate ratio, CI = confidence interval, COPD = chronic obstructive pulmonary disease, HIV = human immunodeficiency virus, URI = upper respiratory tract infection.

**e-Table 4.** Incidences and adjusted incidence rate ratios of medical illnesses in the 4th year after the index date among patients with newly diagnosed bipolar disorder compared with age- and sex-matched controls

|  | Patients  (N = 11,884) | | | Controls  (N = 47,536) | | | aIRRa | 95% CI | *P* value |
| --- | --- | --- | --- | --- | --- | --- | --- | --- | --- |
|  | N | Person-Years of Total Cohort | Crude Incidence /100,000 | N | Person-Years of Total Cohort | Crude Incidence /100,000 |  |  |  |
| Cardiovascular diseases |  |  |  |  |  |  |  |  |  |
| Hypertension | 120 | 7426 | 1615.9 | 301 | 32512 | 925.8 | 1.75 | 1.41–2.16 | <0.001 |
| Ischaemic heart disease | 45 | 7717 | 583.1 | 126 | 33206 | 379.5 | 1.54 | 1.09–2.47 | 0.013 |
| Congestive heart failure | 15 | 8137 | 184.3 | 29 | 33867 | 85.6 | 2.15 | 1.15–4.02 | 0.016 |
| Other forms of heart disease | 101 | 6723 | 1502.3 | 268 | 31725 | 844.8 | 1.78 | 1.41–2.24 | <0.001 |
| Diseases of arteries, arterioles, and capillaries | 31 | 7960 | 389.5 | 74 | 33487 | 221.0 | 1.76 | 1.16–2.68 | 0.008 |
| Diseases of veins and lymphatics | 155 | 6701 | 2313.1 | 463 | 30604 | 1512.9 | 1.53 | 1.27–1.83 | <0.001 |
| Cerebrovascular diseases | 51 | 7723 | 660.4 | 63 | 33496 | 188.1 | 3.51 | 2.43–5.08 | <0.001 |
| Respiratory diseases |  |  |  |  |  |  |  |  |  |
| URI | 255 | 2860 | 8916.1 | 1154 | 14450 | 7986.2 | 1.12 | 0.97–1.28 | 0.111 |
| Pneumonia | 99 | 7121 | 1390.3 | 236 | 31917 | 739.4 | 1.88 | 1.49–2.38 | <0.001 |
| Asthma | 90 | 7104 | 1266.9 | 263 | 31540 | 833.9 | 1.52 | 1.20–1.93 | 0.001 |
| Chronic bronchitis | 81 | 7345 | 1102.8 | 217 | 32018 | 677.7 | 1.63 | 1.26–2.10 | <0.001 |
| COPD | 118 | 5347 | 2206.8 | 341 | 25332 | 1346.1 | 1.64 | 1.33–2.02 | <0.001 |
| Tuberculosis | 12 | 8109 | 148.0 | 34 | 33754 | 100.7 | 1.47 | 0.76–2.84 | 0.252 |
| Gastrointestinal diseases |  |  |  |  |  |  |  |  |  |
| Chronic hepatic disease | 180 | 5848 | 3078.0 | 411 | 29132 | 1410.8 | 2.18 | 1.83–2.60 | <0.001 |
| Ulcer | 149 | 4445 | 3352.1 | 545 | 24374 | 2236.0 | 1.50 | 1.25–1.77 | <0.001 |
| Irritable bowel syndrome | 95 | 7043 | 1348.9 | 253 | 31760 | 796.6 | 1.69 | 1.34–2.14 | <0.001 |
| Renal diseases |  |  |  |  |  |  |  |  |  |
| Chronic kidney disease and renal failure | 22 | 8125 | 270.8 | 24 | 33870 | 70.9 | 3.82 | 2.14–6.81 | <0.001 |
| Endocrine diseases |  |  |  |  |  |  |  |  |  |
| Diabetes mellitus | 103 | 7552 | 1363.9 | 168 | 32798 | 512.2 | 2.66 | 2.08–3.40 | <0.001 |
| Hyperlipidaemia | 162 | 7206 | 2248.1 | 353 | 31910 | 1106.2 | 2.03 | 1.69–2.45 | <0.001 |
| Musculoskeletal/integument diseases |  |  |  |  |  |  |  |  |  |
| Connective tissue disease | 55 | 7540 | 729.4 | 124 | 32497 | 381.6 | 1.91 | 1.39–2.63 | <0.001 |
| Atopic dermatitis | 68 | 7570 | 898.3 | 260 | 31929 | 814.3 | 1.10 | 0.84–1.44 | 0.471 |
| HIV infection | 3 | 8225 | 36.5 | 9 | 34027 | 26.5 | 1.38 | 0.37–5.09 | 0.630 |
| Cancer | 24 | 7974 | 301.0 | 75 | 33432 | 224.3 | 1.34 | 0.85–2.12 | 0.210 |

aEstimated using Poisson regression model.

Abbreviation: aIRR = adjusted incidence rate ratio, CI = confidence interval, COPD = chronic obstructive pulmonary disease, HIV = human immunodeficiency virus, URI = upper respiratory tract infection.

**e-Table 5.** Incidences and adjusted incidence rate ratios of medical illnesses in the 5th year after the index date among patients with newly diagnosed bipolar disorder compared with age- and sex-matched controls

|  | Patients  (N = 11,884) | | | Controls  (N = 47,536) | | | aIRRa | 95% CI | *P* value |
| --- | --- | --- | --- | --- | --- | --- | --- | --- | --- |
|  | N | Person-Years of Total Cohort | Crude Incidence /100,000 | N | Person-Years of Total Cohort | Crude Incidence /100,000 |  |  |  |
| Cardiovascular diseases |  |  |  |  |  |  |  |  |  |
| Hypertension | 104 | 6668 | 1559.7 | 259 | 29399 | 881.0 | 1.77 | 1.41–2.22 | <0.001 |
| Ischaemic heart disease | 45 | 6974 | 645.3 | 135 | 30178 | 447.4 | 1.44 | 1.03–2.02 | 0.033 |
| Congestive heart failure | 20 | 7373 | 271.3 | 32 | 30854 | 103.7 | 2.62 | 1.50–4.57 | <0.001 |
| Other forms of heart disease | 92 | 6061 | 1517.9 | 248 | 28746 | 862.7 | 1.76 | 1.39–2.24 | <0.001 |
| Diseases of arteries, arterioles, and capillaries | 23 | 7199 | 319.5 | 82 | 30477 | 269.1 | 1.19 | 0.75–1.89 | 0.467 |
| Diseases of veins and lymphatics | 117 | 5990 | 1953.3 | 397 | 27637 | 1436.5 | 1.36 | 1.11–1.67 | 0.004 |
| Cerebrovascular diseases | 43 | 6965 | 617.4 | 60 | 30496 | 196.8 | 3.14 | 2.12–4.64 | <0.001 |
| Respiratory diseases |  |  |  |  |  |  |  |  |  |
| URI | 178 | 2486 | 7160.1 | 916 | 12535 | 7307.5 | 0.98 | 0.83–1.15 | 0.804 |
| Pneumonia | 118 | 6425 | 1836.6 | 252 | 29020 | 868.4 | 2.11 | 1.70–2.63 | <0.001 |
| Asthma | 85 | 6417 | 1324.6 | 216 | 28659 | 753.7 | 1.76 | 1.37–2.26 | <0.001 |
| Chronic bronchitis | 73 | 6611 | 1104.2 | 150 | 29052 | 516.3 | 2.14 | 1.62–2.83 | <0.001 |
| COPD | 108 | 4784 | 2257.5 | 278 | 22931 | 1212.3 | 1.86 | 1.49–2.33 | <0.001 |
| Tuberculosis | 5 | 7354 | 68.0 | 31 | 30764 | 100.8 | 0.67 | 0.26–1.74 | 0.414 |
| Gastrointestinal diseases |  |  |  |  |  |  |  |  |  |
| Chronic hepatic disease | 143 | 5180 | 2760.6 | 409 | 26192 | 1561.6 | 1.77 | 1.46–2.14 | <0.001 |
| Ulcer | 107 | 3950 | 2708.9 | 458 | 21808 | 2100.2 | 1.29 | 1.05–1.59 | 0.018 |
| Irritable bowel syndrome | 97 | 6336 | 1530.9 | 254 | 28814 | 881.5 | 1.74 | 1.37–2.19 | <0.001 |
| Renal diseases |  |  |  |  |  |  |  |  |  |
| Chronic kidney disease and renal failure | 20 | 7359 | 271.8 | 24 | 30879 | 77.7 | 3.50 | 1.93–6.33 | <0.001 |
| Endocrine diseases |  |  |  |  |  |  |  |  |  |
| Diabetes mellitus | 111 | 6779 | 1637.4 | 141 | 29770 | 473.6 | 3.46 | 2.70–4.43 | <0.001 |
| Hyperlipidaemia | 133 | 6428 | 2069.1 | 350 | 28805 | 1215.1 | 1.70 | 1.39–2.08 | <0.001 |
| Musculoskeletal/integument diseases |  |  |  |  |  |  |  |  |  |
| Connective tissue disease | 40 | 6793 | 588.8 | 118 | 29533 | 399.6 | 1.47 | 1.03–2.11 | 0.034 |
| Atopic dermatitis | 63 | 6838 | 921.3 | 216 | 29023 | 744.2 | 1.24 | 0.94–1.64 | 0.136 |
| HIV infection | 3 | 7464 | 40.2 | 4 | 31035 | 12.9 | 3.12 | 0.70–13.93 | 0.137 |
| Cancer | 34 | 7220 | 470.9 | 68 | 30448 | 223.3 | 2.11 | 1.40–3.18 | <0.001 |

aEstimated using Poisson regression model.

Abbreviation: aIRR = adjusted incidence rate ratio, CI = confidence interval, COPD = chronic obstructive pulmonary disease, HIV = human immunodeficiency virus, URI = upper respiratory tract infection.

**e-Table 6.** Incidences and adjusted incidence rate ratios of medical illnesses in the 1st year after the diagnosed bipolar disorder compared to the 2nd, 3rd, 4th, 5th year, respectively

|  | Patients  (N = 11,884) | | | aIRRa | 95% CI | *P* value |
| --- | --- | --- | --- | --- | --- | --- |
|  | N | Person-Years of Total Cohort | Crude Incidence /100,000 |  |  |  |
| Cardiovascular diseases |  |  |  |  |  |  |
| Hypertension |  |  |  |  |  |  |
| 1st year | 150 | 11002 | 1363.4 | Reference |  |  |
| 2nd year | 120 | 9666 | 1241.5 | 0.91 | 0.72-1.16 | 0.444 |
| 3rd year | 129 | 8410 | 1533.9 | 1.13 | 0.89-1.42 | 0.326 |
| 4th year | 120 | 7426 | 1615.9 | 1.19 | 0.93-1.51 | 0.165 |
| 5th year | 104 | 6668 | 1559.7 | 1.14 | 0.89-1.47 | 0.292 |
| Ischaemic heart disease |  |  |  |  |  |  |
| 1st year | 103 | 11247 | 915.8 | Reference |  |  |
| 2nd year | 85 | 9916 | 857.2 | 0.94 | 0.70-1.25 | 0.652 |
| 3rd year | 60 | 8664 | 692.5 | 0.76 | 0.55-1.04 | 0.085 |
| 4th year | 45 | 7717 | 583.1 | 0.64 | 0.45-0.90 | 0.015 |
| 5th year | 45 | 6974 | 645.3 | 0.70 | 0.50-1.00 | 0.050 |
| Congestive heart failure |  |  |  |  |  |  |
| 1st year | 34 | 11679 | 291.1 | Reference |  |  |
| 2nd year | 22 | 10360 | 212.4 | 0.73 | 0.43-1.25 | 0.249 |
| 3rd year | 18 | 9116 | 197.5 | 0.68 | 0.38-1.20 | 0.183 |
| 4th year | 15 | 8137 | 184.3 | 0.63 | 0.34-1.16 | 0.140 |
| 5th year | 20 | 7373 | 271.3 | 0.93 | 0.54-1.62 | 0.802 |
| Other forms of heart disease |  |  |  |  |  |  |
| 1st year | 277 | 10026 | 2762.8 | Reference |  |  |
| 2nd year | 173 | 8752 | 1976.7 | 0.72 | 0.59-0.87 | <.001 |
| 3rd year | 139 | 7601 | 1828.7 | 0.66 | 0.54-0.81 | <.001 |
| 4th year | 101 | 6723 | 1502.3 | 0.54 | 0.43-0.68 | <.001 |
| 5th year | 92 | 6061 | 1517.9 | 0.55 | 0.473-0.70 | <.001 |
| Diseases of arteries, arterioles, and capillaries |  |  |  |  |  |  |
| 1st year | 53 | 11489 | 461.3 | Reference |  |  |
| 2nd year | 36 | 10160 | 354.3 | 0.77 | 0.50-1.17 | 0.222 |
| 3rd year | 42 | 8936 | 470.0 | 1.02 | 0.68-1.53 | 0.928 |
| 4th year | 31 | 7960 | 389.4 | 0.84 | 0.54-1.32 | 0.454 |
| 5th year | 23 | 7199 | 319.5 | 0.69 | 0.42-1.13 | 0.141 |
| Diseases of veins and lymphatics |  |  |  |  |  |  |
| 1st year | 322 | 10126 | 3179.9 | Reference |  |  |
| 2nd year | 219 | 8825 | 2481.6 | 0.78 | 0.66-0.93 | 0.005 |
| 3rd year | 186 | 7606 | 2445.4 | 0.77 | 0.64-0.92 | 0.004 |
| 4th year | 155 | 6701 | 2313.1 | 0.73 | 0.60-0.88 | 0.001 |
| 5th year | 117 | 5990 | 1953.3 | 0.61 | 0.50-0.76 | <.001 |
| Cerebrovascular diseases |  |  |  |  |  |  |
| 1st year | 131 | 11238 | 1165.7 | Reference |  |  |
| 2nd year | 87 | 9897 | 879.1 | 0.75 | 0.58-0.99 | 0.041 |
| 3rd year | 55 | 8661 | 635.0 | 0.54 | 0.40-0.75 | <.001 |
| 4th year | 51 | 7723 | 660.4 | 0.57 | 0.41-0.78 | <.001 |
| 5th year | 43 | 6965 | 617.4 | 0.53 | 0.38-0.74 | <.001 |
| Respiratory diseases |  |  |  |  |  |  |
| URI |  |  |  |  |  |  |
| 1st year | 587 | 5004 | 11730.6 | Reference |  |  |
| 2nd year | 442 | 4218 | 10478.9 | 0.89 | 0.79-1.01 | 0.073 |
| 3rd year | 340 | 3410 | 9970.7 | 0.85 | 0.74-0.97 | 0.017 |
| 4th year | 255 | 2860 | 8916.1 | 0.76 | 0.66-0.88 | <.001 |
| 5th year | 178 | 2486 | 7160.1 | 0.61 | 0.52-0.72 | <.001 |
| Pneumonia |  |  |  |  |  |  |
| 1st year | 239 | 10409 | 2296.1 | Reference |  |  |
| 2nd year | 195 | 9167 | 2127.2 | 0.93 | 0.77-1.12 | 0.429 |
| 3rd year | 147 | 8018 | 1833.4 | 0.80 | 0.65-0.98 | 0.032 |
| 4th year | 99 | 7121 | 1390.3 | 0.61 | 0.48-0.77 | <.001 |
| 5th year | 118 | 6425 | 1836.6 | 0.80 | 0.64-1.00 | 0.047 |
| Asthma |  |  |  |  |  |  |
| 1st year | 144 | 10363 | 1389.6 | Reference |  |  |
| 2nd year | 128 | 9122 | 1403.2 | 1.01 | 0.80-1.28 | 0.936 |
| 3rd year | 116 | 7997 | 1450.5 | 1.04 | 0.82-1.33 | 0.731 |
| 4th year | 90 | 7104 | 1266.9 | 0.91 | 0.71-1.19 | 0.492 |
| 5th year | 85 | 6417 | 1324.6 | 0.95 | 0.73-1.25 | 0.726 |
| Chronic bronchitis |  |  |  |  |  |  |
| 1st year | 126 | 10837 | 1162.7 | Reference |  |  |
| 2nd year | 132 | 9531 | 1385.0 | 1.19 | 0.93-1.52 | 0.160 |
| 3rd year | 109 | 8305 | 1312.5 | 1.13 | 0.87-1.46 | 0.354 |
| 4th year | 81 | 7345 | 1102.8 | 0.95 | 0.72-1.25 | 0.710 |
| 5th year | 73 | 6611 | 1104.2 | 0.95 | 0.71-1.27 | 0.726 |
| COPD |  |  |  |  |  |  |
| 1st year | 182 | 8078 | 2253.0 | Reference |  |  |
| 2nd year | 188 | 7047 | 2667.8 | 1.18 | 0.97-1.45 | 0.104 |
| 3rd year | 146 | 6082 | 2400.5 | 1.07 | 0.86-1.32 | 0.568 |
| 4th year | 118 | 5347 | 2206.8 | 0.98 | 0.78-1.23 | 0.861 |
| 5th year | 108 | 4784 | 2257.5 | 1.00 | 0.79-1.27 | 0.987 |
| Tuberculosis |  |  |  |  |  |  |
| 1st year | 27 | 11630 | 232.2 | Reference |  |  |
| 2nd year | 16 | 10314 | 155.1 | 0.67 | 0.36-1.24 | 0.201 |
| 3rd year | 15 | 9083 | 165.1 | 0.71 | 0.38-1.34 | 0.290 |
| 4th year | 12 | 8109 | 148.0 | 0.64 | 0.32-1.26 | 0.194 |
| 5th year | 5 | 7354 | 68.0 | 0.29 | 0.11-0.76 | 0.011 |
| Gastrointestinal diseases |  |  |  |  |  |  |
| Chronic hepatic disease |  |  |  |  |  |  |
| 1st year | 386 | 9210 | 4191.1 | Reference |  |  |
| 2nd year | 248 | 7880 | 3147.2 | 0.75 | 0.64-0.88 | <.001 |
| 3rd year | 187 | 6695 | 2793.1 | 0.67 | 0.56-0.79 | <.001 |
| 4th year | 180 | 5848 | 3078.0 | 0.73 | 0.62-0.88 | <.001 |
| 5th year | 143 | 5180 | 2760.6 | 0.66 | 0.54-0.80 | <.001 |
| Ulcer |  |  |  |  |  |  |
| 1st year | 447 | 7334 | 6094.9 | Reference |  |  |
| 2nd year | 258 | 6147 | 4197.2 | 0.69 | 0.59-0.80 | <.001 |
| 3rd year | 180 | 5153 | 3493.1 | 0.57 | 0.48-0.68 | <.001 |
| 4th year | 149 | 4445 | 3352.1 | 0.55 | 0.46-0.66 | <.001 |
| 5th year | 107 | 3950 | 2708.9 | 0.44 | 0.36-0.55 | <.001 |
| Irritable bowel syndrome |  |  |  |  |  |  |
| 1st year | 189 | 10481 | 1803.3 | Reference |  |  |
| 2nd year | 166 | 9172 | 1809.9 | 1.00 | 0.81-1.24 | 0.973 |
| 3rd year | 126 | 7961 | 1582.7 | 0.88 | 0.70-1.10 | 0.257 |
| 4th year | 95 | 7043 | 1348.9 | 0.75 | 0.58-0.96 | 0.021 |
| 5th year | 97 | 6336 | 1530.9 | 0.85 | 0.66-1.08 | 0.190 |
| Renal diseases |  |  |  |  |  |  |
| Chronic kidney disease and renal failure |  |  |  |  |  |  |
| 1st year | 35 | 11684 | 299.6 | Reference |  |  |
| 2nd year | 31 | 10362 | 299.2 | 1.00 | 0.62-1.62 | 0.996 |
| 3rd year | 28 | 8109 | 345.3 | 1.15 | 0.70-1.89 | 0.575 |
| 4th year | 22 | 8125 | 270.8 | 0.90 | 0.53-1.54 | 0.710 |
| 5th year | 20 | 7359 | 271.8 | 0.91 | 0.52-1.57 | 0.728 |
| Endocrine diseases |  |  |  |  |  |  |
| Diabetes mellitus |  |  |  |  |  |  |
| 1st year | 120 | 11147 | 1076.5 | Reference |  |  |
| 2nd year | 123 | 9805 | 1254.5 | 1.17 | 0.91-1.50 | 0.233 |
| 3rd year | 107 | 8531 | 1254.2 | 1.17 | 0.90-1.51 | 0.251 |
| 4th year | 103 | 7552 | 1363.9 | 1.27 | 0.97-1.65 | 0.078 |
| 5th year | 111 | 6779 | 1637.4 | 1.52 | 1.18-1.97 | 0.001 |
| Hyperlipidaemia |  |  |  |  |  |  |
| 1st year | 232 | 10845 | 2139.2 | Reference |  |  |
| 2nd year | 193 | 9442 | 2044.1 | 0.96 | 0.79-1.16 | 0.640 |
| 3rd year | 143 | 8175 | 1749.2 | 0.82 | 0.66-1.01 | 0.058 |
| 4th year | 162 | 7206 | 2248.1 | 1.06 | 0.86-1.28 | 0.628 |
| 5th year | 133 | 6428 | 2069.1 | 0.97 | 0.78-1.20 | 0.759 |
| Musculoskeletal/integument diseases |  |  |  |  |  |  |
| Connective tissue disease |  |  |  |  |  |  |
| 1st year | 80 | 11009 | 726.7 | Reference |  |  |
| 2nd year | 53 | 9701 | 546.3 | 0.75 | 0.53-1.06 | 0.107 |
| 3rd year | 63 | 8490 | 742.0 | 1.02 | 0.73-1.42 | 0.901 |
| 4th year | 55 | 7540 | 729.4 | 1.00 | 0.71-1.42 | 0.983 |
| 5th year | 40 | 6793 | 588.8 | 0.81 | 0.55-1.18 | 0.277 |
| Atopic dermatitis |  |  |  |  |  |  |
| 1st year | 110 | 10987 | 1001.2 | Reference |  |  |
| 2nd year | 101 | 9718 | 1039.3 | 1.04 | 0.79-1.36 | 0.786 |
| 3rd year | 105 | 8509 | 1234.0 | 1.23 | 0.94-1.61 | 0.125 |
| 4th year | 68 | 7570 | 898.3 | 0.90 | 0.66-1.21 | 0.482 |
| 5th year | 63 | 6838 | 921.3 | 0.92 | 0.68-1.25 | 0.599 |
| HIV infection |  |  |  |  |  |  |
| 1st year | 16 | 11760 | 136.1 | Reference |  |  |
| 2nd year | 9 | 10446 | 86.2 | 0.63 | 0.28-1.43 | 0.273 |
| 3rd year | 4 | 9206 | 43.4 | 0.32 | 0.11-0.96 | 0.041 |
| 4th year | 3 | 8225 | 36.5 | 0.27 | 0.08-0.92 | 0.036 |
| 5th year | 3 | 7464 | 40.2 | 0.30 | 0.09-1.01 | 0.053 |
| Cancer |  |  |  |  |  |  |
| 1st year | 49 | 11480 | 426.8 | Reference |  |  |
| 2nd year | 31 | 10172 | 304.8 | 0.71 | 0.46-1.12 | 0.142 |
| 3rd year | 37 | 8937 | 414.0 | 0.97 | 0.63-1.49 | 0.889 |
| 4th year | 24 | 7974 | 301.0 | 0.71 | 0.43-1.15 | 0.161 |
| 5th year | 34 | 7220 | 470.9 | 1.10 | 0.71-1.71 | 0.660 |

aEstimated using Poisson regression model.

Abbreviation: aIRR = adjusted incidence rate ratio, CI = confidence interval, COPD = chronic obstructive pulmonary disease, HIV = human immunodeficiency virus, URI = upper respiratory tract infection.

**e-Table 7.** Incidences and adjusted incidence rate ratios of medical illnesses in the 1st year after the index date among patients with newly diagnosed bipolar disorder aged 13-18 (adolescent-onset) compared with age- and sex-matched controls

|  | Patients  (N = 909) | | | Controls  (N = 3,636) | | | aIRRa | 95% CI | *P* value |
| --- | --- | --- | --- | --- | --- | --- | --- | --- | --- |
|  | N | Person-Years of Total Cohort | Crude Incidence /100,000 | N | Person-Years of Total Cohort | Crude Incidence /100,000 |  |  |  |
| Cardiovascular diseases |  |  |  |  |  |  |  |  |  |
| Hypertension | 5 | 895 | 558.7 | 4 | 3574 | 111.9 | 4.99 | 1.34-18.59 | 0.017 |
| Ischaemic heart disease | 2 | 899 | 222.5 | 4 | 3566 | 112.2 | 1.98 | 0.36-10.83 | 0.429 |
| Congestive heart failure | 1 | 905 | 110.5 | 0 | 3586 | 0 | － | － | － |
| Other forms of heart disease | 16 | 848 | 1886.8 | 24 | 3426 | 700.5 | 2.69 | 1.43-5.07 | 0.002 |
| Diseases of arteries, arterioles, and capillaries | 4 | 891 | 448.9 | 5 | 3547 | 141 | 3.18 | 0.86-11.86 | 0.084 |
| Diseases of veins and lymphatics | 16 | 859 | 1862.6 | 23 | 3525 | 652.5 | 2.85 | 1.51-5.40 | 0.001 |
| Cerebrovascular diseases | 7 | 880 | 795.5 | 2 | 3570 | 56 | 14.2 | 2.95-68.35 | <0.001 |
| Respiratory diseases |  |  |  |  |  |  |  |  |  |
| URI | 57 | 346 | 16474 | 184 | 1583 | 11623.5 | 1.42 | 1.05-1.91 | 0.021 |
| Pneumonia | 19 | 748 | 2540.1 | 19 | 3188 | 596 | 4.26 | 2.57-8.05 | <0.001 |
| Asthma | 11 | 745 | 1476.5 | 14 | 3141 | 445.7 | 3.31 | 1.50-7.30 | 0.003 |
| Chronic bronchitis | 8 | 874 | 915.3 | 10 | 3484 | 287 | 3.19 | 1.26-8.08 | 0.015 |
| COPD | 11 | 583 | 1886.8 | 26 | 2426 | 1071.7 | 1.76 | 0.87-3.56 | 0.116 |
| Tuberculosis | 0 | 902 | 0 | 2 | 3576 | 55.9 | － | － | － |
| Gastrointestinal diseases |  |  |  |  |  |  |  |  |  |
| Chronic hepatic disease | 19 | 857 | 2217 | 20 | 3501 | 571.3 | 3.88 | 2.07-7.27 | <0.001 |
| Ulcer | 24 | 729 | 3292.2 | 54 | 3097 | 1743.6 | 1.89 | 1.17-3.05 | 0.010 |
| Irritable bowel syndrome | 14 | 850 | 1647.1 | 19 | 3495 | 543.6 | 3.03 | 1.52-6.04 | 0.002 |
| Renal diseases |  |  |  |  |  |  |  |  |  |
| Chronic kidney disease and renal failure | 0 | 905 | 0 | 1 | 3587 | 27.9 | － | － | － |
| Endocrine diseases |  |  |  |  |  |  |  |  |  |
| Diabetes mellitus | 4 | 898 | 445.4 | 10 | 3566 | 280.4 | 1.59 | 0.50-5.06 | 0.434 |
| Hyperlipidaemia | 7 | 892 | 784.8 | 9 | 3565 | 252.5 | 3.11 | 1.16-8.35 | 0.024 |
| Musculoskeletal/integument diseases |  |  |  |  |  |  |  |  |  |
| Connective tissue disease | 5 | 880 | 568.2 | 4 | 3550 | 112.7 | 5.04 | 1.35-148.77 | 0.016 |
| Atopic dermatitis | 10 | 824 | 1213.6 | 23 | 3337 | 689.2 | 1.76 | 0.84-3.70 | 0.135 |
| HIV infection | 1 | 907 | 110.3 | 0 | 3589 | 0 | － | － | － |
| Cancer | 0 | 898 | 0 | 4 | 3572 | 112 | － | － | － |

aEstimated using Poisson regression model.

Abbreviation: aIRR = adjusted incidence rate ratio, CI = confidence interval, COPD = chronic obstructive pulmonary disease, HIV = human immunodeficiency virus, URI = upper respiratory tract infection.

**e-Table 8.** Incidences and adjusted incidence rate ratios of medical illnesses in the 1st year after the index date among patients with newly diagnosed bipolar disorder aged 19-40 (adult-onset) compared with age- and sex-matched controls

|  | Patients  (N = 10,975) | | | Controls  (N = 43,900) | | | aIRRa | 95% CI | *P* value |
| --- | --- | --- | --- | --- | --- | --- | --- | --- | --- |
|  | N | Person-Years of Total Cohort | Crude Incidence /100,000 | N | Person-Years of Total Cohort | Crude Incidence /100,000 |  |  |  |
| Cardiovascular diseases |  |  |  |  |  |  |  |  |  |
| Hypertension | 145 | 10107 | 1434.7 | 278 | 42601 | 652.6 | 2.20 | 1.80-2.69 | <0.001 |
| Ischaemic heart disease | 101 | 10347 | 976.1 | 119 | 43127 | 275.9 | 3.54 | 2.71-4.61 | <0.001 |
| Congestive heart failure | 33 | 10775 | 306.3 | 27 | 43698 | 61.8 | 4.96 | 2.98-8.24 | <0.001 |
| Other forms of heart disease | 261 | 9178 | 2843.8 | 337 | 41435 | 813.3 | 3.50 | 2.97-4.11 | <0.001 |
| Diseases of arteries, arterioles, and capillaries | 49 | 10598 | 462.4 | 84 | 43308 | 194.0 | 2.38 | 1.68-3.39 | <0.001 |
| Diseases of veins and lymphatics | 306 | 9267 | 3302.0 | 530 | 40479 | 1309.3 | 2.52 | 2.19-2.90 | <0.001 |
| Cerebrovascular diseases | 124 | 10358 | 1197.1 | 72 | 43322 | 166.2 | 7.20 | 5.39-9.63 | <.0010 |
| Respiratory diseases |  |  |  |  |  |  |  |  |  |
| URI | 530 | 4658 | 11378.3 | 1905 | 21195 | 8988.0 | 1.27 | 1.15-1.39 | <0.001 |
| Pneumonia | 220 | 9661 | 2277.2 | 336 | 41401 | 811.6 | 2.81 | 2.37-3.33 | <0.001 |
| Asthma | 133 | 9618 | 1382.8 | 322 | 40866 | 787.9 | 1.76 | 1.43-2.15 | <0.001 |
| Chronic bronchitis | 118 | 9963 | 1184.4 | 277 | 41776 | 663.1 | 1.79 | 1.44-2.22 | <0.001 |
| COPD | 171 | 7494 | 2281.8 | 488 | 32854 | 1485.4 | 1.54 | 1.29-1.83 | <0.001 |
| Tuberculosis | 27 | 10728 | 251.7 | 40 | 43567 | 91.8 | 2.74 | 1.68-4.47 | <0.001 |
| Gastrointestinal diseases |  |  |  |  |  |  |  |  |  |
| Chronic hepatic disease | 367 | 8353 | 4393.6 | 644 | 39034 | 1649.8 | 2.66 | 2.34-3.03 | <0.001 |
| Ulcer | 423 | 6605 | 6404.2 | 794 | 33095 | 2399.2 | 2.67 | 2.37-3.00 | <0.001 |
| Irritable bowel syndrome | 175 | 9631 | 1817.1 | 347 | 41496 | 836.2 | 2.17 | 1.81-2.61 | <0.001 |
| Renal diseases |  |  |  |  |  |  |  |  |  |
| Chronic kidney disease and renal failure | 35 | 10779 | 324.7 | 30 | 43662 | 68.7 | 4.73 | 2.90-7.70 | <0.001 |
| Endocrine diseases |  |  |  |  |  |  |  |  |  |
| Diabetes mellitus | 116 | 10249 | 1131.8 | 175 | 42759 | 409.3 | 2.77 | 2.19-3.50 | <0.001 |
| Hyperlipidaemia | 225 | 9953 | 2260.6 | 375 | 42039 | 892.0 | 2.53 | 2.15-2.99 | <0.001 |
| Musculoskeletal/integument diseases |  |  |  |  |  |  |  |  |  |
| Connective tissue disease | 75 | 10129 | 740.5 | 144 | 42256 | 340.8 | 2.17 | 1.64-2.87 | <0.001 |
| Atopic dermatitis | 100 | 10163 | 984.0 | 304 | 41525 | 732.1 | 1.34 | 1.07-1.68 | 0.010 |
| HIV infection | 15 | 10852 | 138.2 | 8 | 43840 | 18.3 | 7.57 | 3.21-17.87 | <0.001 |
| Cancer | 49 | 10581 | 463.1 | 78 | 43275 | 180.2 | 2.57 | 1.80-3.67 | <0.001 |

aEstimated using Poisson regression model.

Abbreviation: aIRR = adjusted incidence rate ratio, CI = confidence interval, COPD = chronic obstructive pulmonary disease, HIV = human immunodeficiency virus, URI = upper respiratory tract infection.

**e-Figure 2.** Study flow diagram of the first sensitivity analysis: bipolar disorder (age 13-29) versus the comparison controls

Patients with diagnosis of bipolar disorder (ICD-9-CM code: 296·0 to 296·16, 296·4 to 296·81, 296·89) between 1998/1/1 and 2012/12/31 (*n* = 42,470)

No diagnosis of bipolar disorder between 1996/1/1 and 1997/12/31 (*n* = 42,085)

Bipolar disorder group (*n* = 22,021)

Patients with ICD-9-CM code 290·** to 319·**) in the Taiwan Nationwide Psychiatric Inpatient Medical Claims (PIMC) database between 1996/1/1 and 2012/12/31 (*n* = 256,880)

Excluding ever diagnosed with schizophrenia (ICD-9-CM code: 295·**) in the study cohort between 1996/1/1 and 2012/12/31 (*n* = 20,064)

Age-and sex-matched comparison group (ratio: 1:4) randomly selected from the Taiwan National Health Insurance Research Database

Patients aged 13–29 years receiving their first diagnosis of bipolar disorder between 1998/1/1 and 2011/12/31 (*n* = 7,319)

Valid case-comparison pairs for all incident bipolar disorder patients (7,319 bipolar cases and 29,276 general population comparisons)

Patients aged 13–29 years receiving their first diagnosis of bipolar disorder (*n* = 8,315)

**e-Table 9.** The first sensitivity analysis: incidences and adjusted incidence rate ratios of medical illnesses in the 1st year after the index date among patients with newly diagnosed bipolar disorder aged 13-29 compared with age- and sex-matched controls

|  | Patients  (N =7,319) | | | Controls  (N =29,276) | | | aIRRa | 95% CI | *P* value |
| --- | --- | --- | --- | --- | --- | --- | --- | --- | --- |
|  | N | Person-Years of Total Cohort | Crude Incidence /100,000 | N | Person-Years of Total Cohort | Crude Incidence /100,000 |  |  |  |
| Cardiovascular diseases |  |  |  |  |  |  |  |  |  |
| Hypertension | 50 | 7018 | 712.5 | 88 | 28823 | 305.31 | 2.33 | 1.65-3.30 | <0.001 |
| Ischaemic heart disease | 36 | 7084 | 508.2 | 58 | 28936 | 200.44 | 2.54 | 1.67-3.84 | <0.001 |
| Congestive heart failure | 12 | 7240 | 165.7 | 13 | 29176 | 44.56 | 3.72 | 1.70-8.15 | 0.001 |
| Other forms of heart disease | 165 | 6279 | 2627.8 | 187 | 27740 | 674.12 | 3.90 | 3.16-4.81 | <0.001 |
| Diseases of arteries, arterioles, and capillaries | 25 | 7151 | 349.6 | 46 | 28904 | 159.15 | 2.20 | 1.35-3.58 | 0.002 |
| Diseases of veins and lymphatics | 164 | 6517 | 2516.5 | 314 | 27683 | 1134.27 | 2.22 | 1.84-2.68 | <0.001 |
| Cerebrovascular diseases | 52 | 7051 | 737.5 | 30 | 28969 | 103.56 | 7.12 | 4.54-11.16 | <0.001 |
| Respiratory diseases |  |  |  |  |  |  |  |  |  |
| URI | 328 | 2958 | 11088.6 | 1237 | 13343 | 9270.78 | 1.20 | 1.06-1.35 | 0.004 |
| Pneumonia | 131 | 6404 | 2045.6 | 214 | 27282 | 784.4 | 2.61 | 2.10-3.24 | <0.001 |
| Asthma | 76 | 6358 | 1195.3 | 183 | 26886 | 680.65 | 1.76 | 1.34-2.29 | <0.001 |
| Chronic bronchitis | 54 | 6812 | 792.7 | 137 | 28078 | 487.93 | 1.62 | 1.19-2.23 | 0.003 |
| COPD | 84 | 5077 | 1654.5 | 273 | 21460 | 1272.13 | 1.30 | 1.02-1.66 | 0.035 |
| Tuberculosis | 14 | 7211 | 194.1 | 19 | 29091 | 65.31 | 2.97 | 1.49-5.93 | 0.002 |
| Gastrointestinal diseases |  |  |  |  |  |  |  |  |  |
| Chronic hepatic disease | 178 | 6246 | 2849.8 | 307 | 27000 | 1137.04 | 2.50 | 2.08-3.01 | <0.001 |
| Ulcer | 231 | 5028 | 4594.3 | 491 | 23436 | 2095.07 | 2.19 | 1.88-2.56 | <0.001 |
| Irritable bowel syndrome | 91 | 6613 | 1376.1 | 217 | 27923 | 777.14 | 1.77 | 1.39-2.26 | <0.001 |
| Renal diseases |  |  |  |  |  |  |  |  |  |
| Chronic kidney disease and renal failure | 13 | 7243 | 179.5 | 11 | 29160 | 37.72 | 4.76 | 2.13-11.62 | <0.001 |
| Endocrine diseases |  |  |  |  |  |  |  |  |  |
| Diabetes mellitus | 49 | 7073 | 692.8 | 79 | 28809 | 274.22 | 2.53 | 1.77-3.61 | <0.001 |
| Hyperlipidaemia | 88 | 6990 | 1258.9 | 164 | 28562 | 574.19 | 2.19 | 1.69-2.84 | <0.001 |
| Musculoskeletal/integument diseases |  |  |  |  |  |  |  |  |  |
| Connective tissue disease | 40 | 6985 | 572.7 | 63 | 28580 | 220.43 | 2.60 | 1.75-3.86 | <0.001 |
| Atopic dermatitis | 67 | 6774 | 989.1 | 211 | 27481 | 767.8 | 1.29 | 0.98-1.70 | 0.071 |
| HIV infection | 11 | 7261 | 151.5 | 5 | 29219 | 17.11 | 8.85 | 3.08-25.48 | <0.001 |
| Cancer | 16 | 7175 | 223.0 | 31 | 29023 | 106.81 | 2.09 | 1.14-3.82 | 0.017 |

aEstimated using Poisson regression model.

Abbreviation: aIRR = adjusted incidence rate ratio, CI = confidence interval, COPD = chronic obstructive pulmonary disease, HIV = human immunodeficiency virus, URI = upper respiratory tract infection.

**e-Figure 3.** Study flow diagram of the second sensitivity analysis: bipolar disorder (5-year washout period) versus the comparison controls

Patients with diagnosis of bipolar disorder (ICD-9-CM code: 296·0 to 296·16, 296·4 to 296·81, 296·89) between 2001/1/1 and 2012/12/31 (*n* = 35,908)

No diagnosis of bipolar disorder between 1996/1/1 and 2000/12/31 (*n* = 32,643)

Bipolar disorder group (*n* = 18,687)

Patients with ICD-9-CM code 290·** to 319·**) in the Taiwan Nationwide Psychiatric Inpatient Medical Claims (PIMC) database between 1996/1/1 and 2012/12/31 (*n* = 256,880)

Excluding ever diagnosed with schizophrenia (ICD-9-CM code: 295·**) in the study cohort between 1996/1/1 and 2012/12/31 (*n* = 13,956)

Age-and sex-matched comparison group (ratio: 1:4) randomly selected from the Taiwan National Health Insurance Research Database

Patients aged 13–40 years receiving their first diagnosis of bipolar disorder between 2001/1/1 and 2011/12/31 (*n* = 10,231)

Valid case-comparison pairs for all incident bipolar disorder patients (10,231 bipolar cases and 40,924 general population comparisons)

Patients aged 13–40 years receiving their first diagnosis of bipolar disorder (*n* = 11,444)

**e-Table 10.** The second sensitivity analysis: incidences and adjusted incidence rate ratios of medical illnesses in the 1st year after the index date among patients with newly diagnosed bipolar disorder between 2001 and 2011 compared with age- and sex-matched controls

|  | Patients  (N =10,231) | | | Controls  (N =40,924) | | | aIRRa | 95% CI | *P* value |
| --- | --- | --- | --- | --- | --- | --- | --- | --- | --- |
|  | N | Person-Years of Total Cohort | Crude Incidence /100,000 | N | Person-Years of Total Cohort | Crude Incidence /100,000 |  |  |  |
| Cardiovascular diseases |  |  |  |  |  |  |  |  |  |
| Hypertension | 123 | 9432 | 1304.1 | 223 | 39660 | 562.28 | 2.32 | 1.86-2.89 | <0.001 |
| Ischaemic heart disease | 90 | 9637 | 933.9 | 95 | 40122 | 236.78 | 3.94 | 2.96-5.26 | <0.001 |
| Congestive heart failure | 30 | 10046 | 298.6 | 24 | 40686 | 58.99 | 5.06 | 2.96-8.66 | <0.001 |
| Other forms of heart disease | 234 | 8480 | 2759.4 | 305 | 38375 | 794.79 | 3.47 | 2.93-4.12 | <0.001 |
| Diseases of arteries, arterioles, and capillaries | 48 | 9864 | 486.6 | 75 | 40270 | 186.24 | 2.61 | 1.82-3.75 | <0.001 |
| Diseases of veins and lymphatics | 274 | 8592 | 3189.0 | 467 | 37553 | 1243.58 | 2.56 | 2.21-2.98 | <0.001 |
| Cerebrovascular diseases | 115 | 9646 | 1192.2 | 51 | 40326 | 126.47 | 9.43 | 0.68-13.11 | <0.001 |
| Respiratory diseases |  |  |  |  |  |  |  |  |  |
| URI | 404 | 3707 | 10898.3 | 1489 | 17187 | 8663.52 | 1.26 | 1.13-1.40 | <0.001 |
| Pneumonia | 219 | 8821 | 2482.7 | 325 | 38043 | 854.30 | 2.91 | 2.45-3.45 | <0.001 |
| Asthma | 121 | 8779 | 1378.3 | 285 | 37481 | 760.39 | 1.81 | 1.47-2.24 | <0.001 |
| Chronic bronchitis | 101 | 9246 | 1092.4 | 232 | 38750 | 598.71 | 1.82 | 1.44-2.30 | <0.001 |
| COPD | 142 | 6821 | 2081.8 | 390 | 29744 | 1311.19 | 1.59 | 1.31-1.92 | <0.001 |
| Tuberculosis | 25 | 9999 | 250.0 | 34 | 40548 | 83.85 | 2.98 | 1.78-5.00 | <0.001 |
| Gastrointestinal diseases |  |  |  |  |  |  |  |  |  |
| Chronic hepatic disease | 301 | 7790 | 3863.9 | 502 | 36229 | 1385.63 | 2.79 | 2.42-3.22 | <0.001 |
| Ulcer | 357 | 6201 | 5757.1 | 700 | 30802 | 2272.58 | 2.53 | 2.23-2.88 | <0.001 |
| Irritable bowel syndrome | 161 | 8892 | 1810.6 | 303 | 38470 | 787.63 | 2.30 | 1.90-2.78 | <0.001 |
| Renal diseases |  |  |  |  |  |  |  |  |  |
| Chronic kidney disease and renal failure | 28 | 10060 | 278.3 | 21 | 40651 | 51.66 | 5.39 | 3.06-9.49 | <0.001 |
| Endocrine diseases |  |  |  |  |  |  |  |  |  |
| Diabetes mellitus | 98 | 9561 | 1025.0 | 145 | 39777 | 364.53 | 2.81 | 2.18-3.63 | <0.001 |
| Hyperlipidaemia | 198 | 9276 | 2134.5 | 324 | 39065 | 829.39 | 2.57 | 2.16-3.07 | <0.001 |
| Musculoskeletal/integument diseases |  |  |  |  |  |  |  |  |  |
| Connective tissue disease | 66 | 9484 | 695.9 | 123 | 39394 | 312.23 | 2.23 | 1.65-3.01 | <0.001 |
| Atopic dermatitis | 95 | 9362 | 1014.7 | 298 | 38292 | 778.23 | 1.30 | 1.04-1.64 | 0.024 |
| HIV infection | 15 | 10123 | 148.2 | 8 | 40817 | 19.60 | 7.56 | 3.21-17.83 | <0.001 |
| Cancer | 38 | 9868 | 385.1 | 66 | 40292 | 163.80 | 2.35 | 1.58-3.50 | <0.001 |

aEstimated using Poisson regression model.

Abbreviation: aIRR = adjusted incidence rate ratio, CI = confidence interval, COPD = chronic obstructive pulmonary disease, HIV = human immunodeficiency virus, URI = upper respiratory tract infection.
